# Supplementary material
Source: PubMed Central journal article supplement (PMC6037164)
Supplement: NIHMS393712-supplement-1_si_001.pdf [file NIHMS393712-supplement-1_si_001.pdf]

Supporting Information for the manuscript:

## **Surface Acoustic Wave Nebulization Facilitates Lipid Mass Spectrometric Analysis**

Sung Hwan Yoon,<sup>a,b</sup> Yue Huang,<sup>a</sup> J. Scott Edgar,<sup>a,b</sup> Ying S. Ting,<sup>a</sup> Scott R. Heron,<sup>a</sup> Yuchieh Kao,<sup>a</sup> Yanyan Li,<sup>c</sup> Christophe D. Masselon,<sup>d,e</sup> Robert K. Ernst,<sup>c</sup> and David R. Goodlett<sup>a\*</sup>

<sup>a</sup> Department of Medicinal Chemistry, University of Washington, Seattle, Washington, USA

<sup>b</sup> Deurion LLC, Seattle, Washington, USA

<sup>c</sup> Department of Microbial Pathogenesis, University of Maryland, Baltimore, Maryland, USA

<sup>d</sup> CEA, DSV, iRTSV, Laboratoire de Biologie à Grande Echelle, Grenoble, France

<sup>e</sup> INSERM, Unite 1038, Grenoble, France

List of items:

Supporting figures: Figure S1, Figure S2

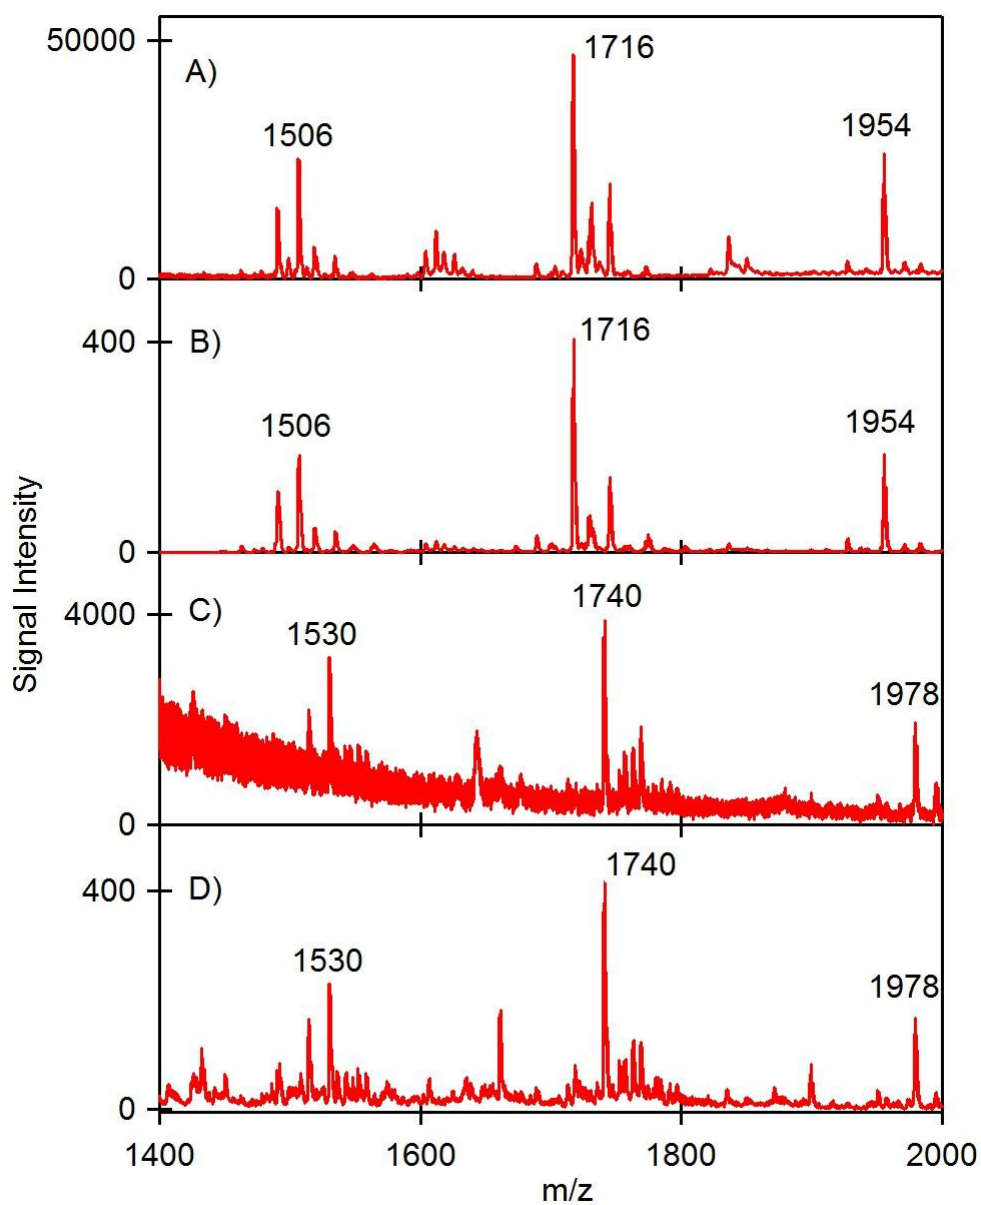

**Figure S1.** MS<sup>1</sup> spectrum of *Salmonella minnesota* lipid A. Negative ion mode of ESI (A), negative ion mode of SAWN (B), positive ion mode of ESI (C), and positive ion mode of SAWN (D).

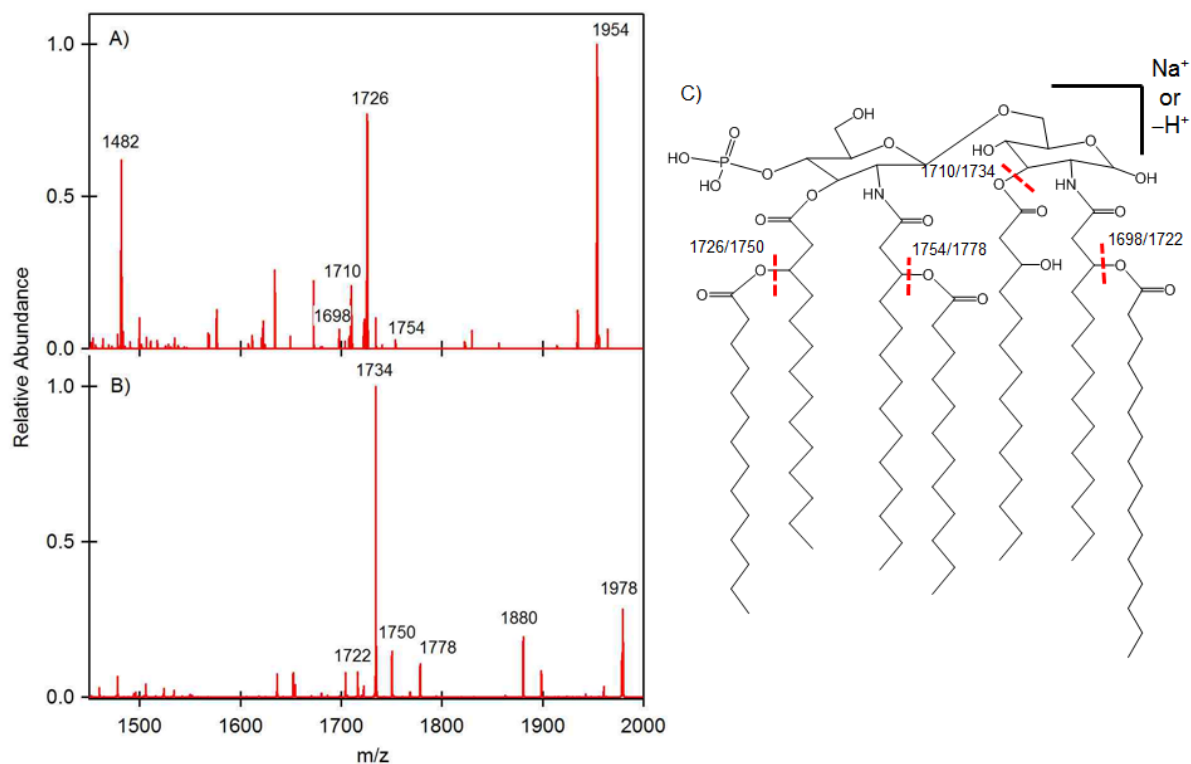

**Figure S2.** SAWN Tandem MS spectrum of *Salmonella minnesota* lipid A. MS<sup>2</sup> of negative ion,  $m/z$  1954 (A), MS<sup>2</sup> of positive ion mode,  $m/z$  1978 (B). (C) is the structure of mono-phosphorylated hepta-acyl ion and fragmentation sites.
